# Supplementary material
Source: bioRxiv or medRxiv preprint supplement (https://www.biorxiv.org/highwire/filestream/86123/field_highwire_adjunct_files/16/098178-8.pdf)

## A. ClbJ (2166 aa)

**Protein Classification:** A\_NRPS\_Ta1\_like and A\_NRPS\_TlmIV\_like domain-containing protein  
protein containing domains HxxPF\_rpt, A\_NRPS\_Ta1\_like, A\_NRPS\_TlmIV\_like, and PP-binding

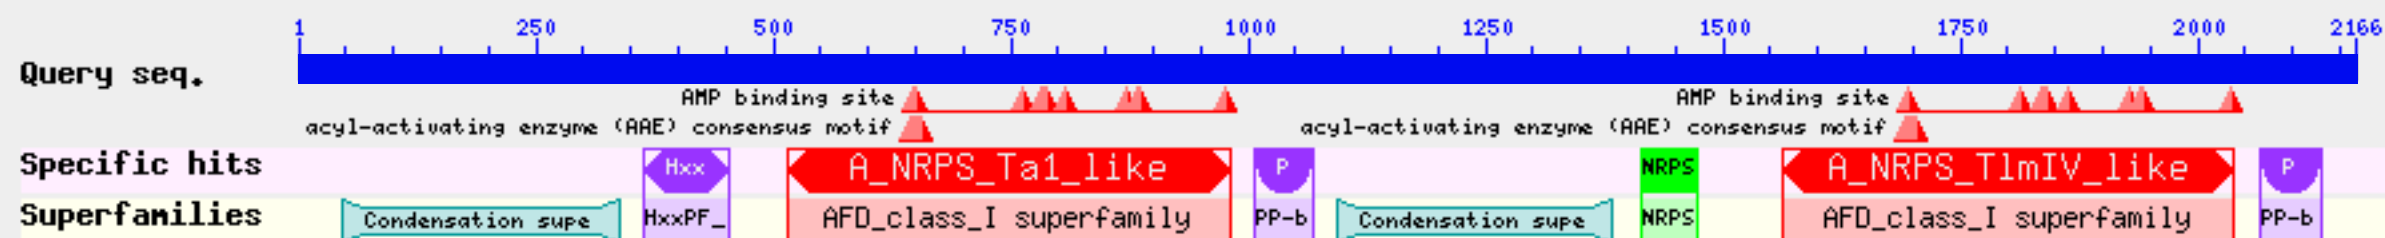

## B. ClbK (2154 aa)

**Protein Classification:** PKS and A\_NRPS\_TlmIV\_like domain-containing protein  
protein containing domains PKS, A\_NRPS\_TlmIV\_like, mcbC-like\_oxidoreductase, and PP-binding

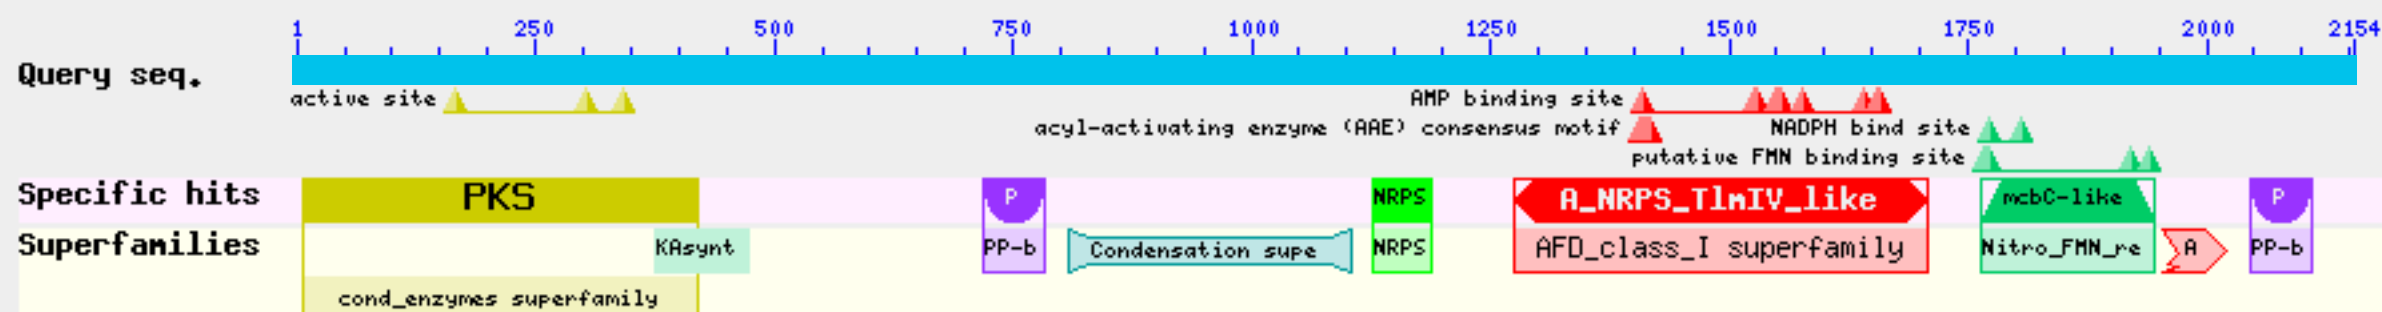

## C. ClbJK fusion product created by deletion (2440 aa)

**Protein Classification:** A\_NRPS\_Ta1\_like and A\_NRPS\_TlmIV\_like domain-containing protein  
protein containing domains HxxPF\_rpt, A\_NRPS\_Ta1\_like, A\_NRPS\_TlmIV\_like, and mcbC-like\_oxidoreductase

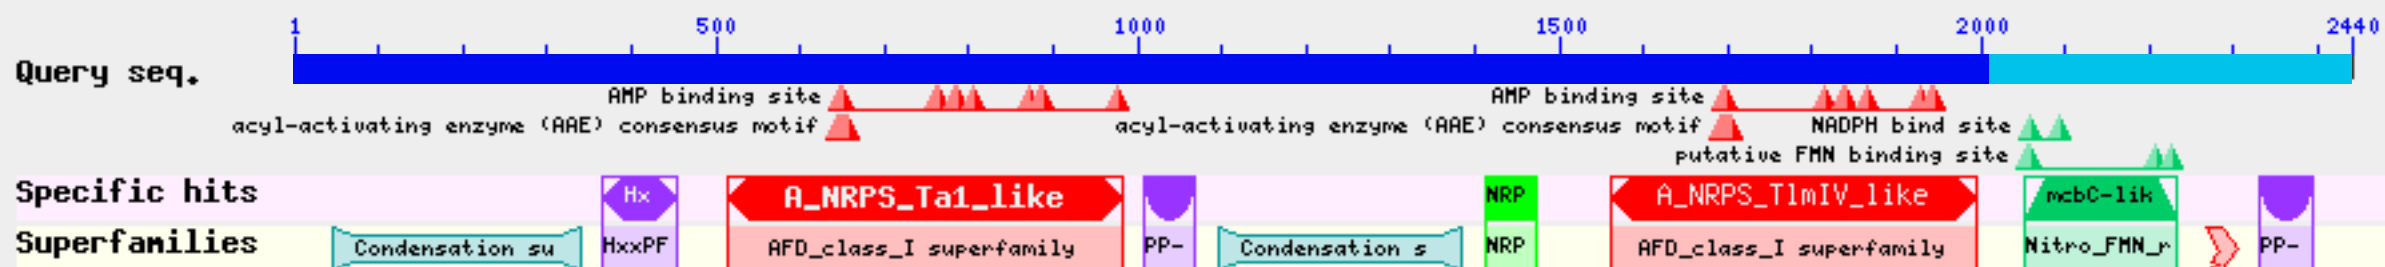

Supplement: Supplementary file [file 098178-8.pdf]
